# Supplementary material
Source: PubMed Central journal article supplement (PMC7274215)
Supplement: 79779-2020.05.02.20088872-1.pdf [file 79779-2020.05.02.20088872-1.pdf]

# Assessment of Hydroxychloroquine and Chloroquine Safety Profiles – A Systematic Review and Meta-Analysis

Lu Ren<sup>1</sup>, MD, Wilson Xu<sup>1</sup>, BS, James L Overton<sup>1</sup>, MS, Shandong Yu<sup>3</sup>, MD, PhD,  
Nipavan Chiamvimonvat<sup>1,2</sup>, MD, and Phung N. Thai<sup>1</sup>, PhD

<sup>1</sup>Department of Internal Medicine, Cardiology, UC Davis; <sup>2</sup>Department of Veteran Affairs;  
<sup>3</sup>Department of Cardiology, Cardiovascular Center, Beijing Friendship Hospital, Capital Medical  
University, Beijing

Corresponding authors:

Phung N. Thai and Nipavan Chiamvimonvat  
Division of Cardiovascular Medicine  
University of California, Davis  
451 Health Science Drive, GBSF 6315  
Davis, CA 95616  
Department of Veterans Affairs, Northern California Health Care System  
10535 Hospital Way  
Mather, CA 95655  
Emails: [pnthai@ucdavis.edu](mailto:pnthai@ucdavis.edu); [ncchiamvimonvat@ucdavis.edu](mailto:ncchiamvimonvat@ucdavis.edu)

## Supplementary Figures

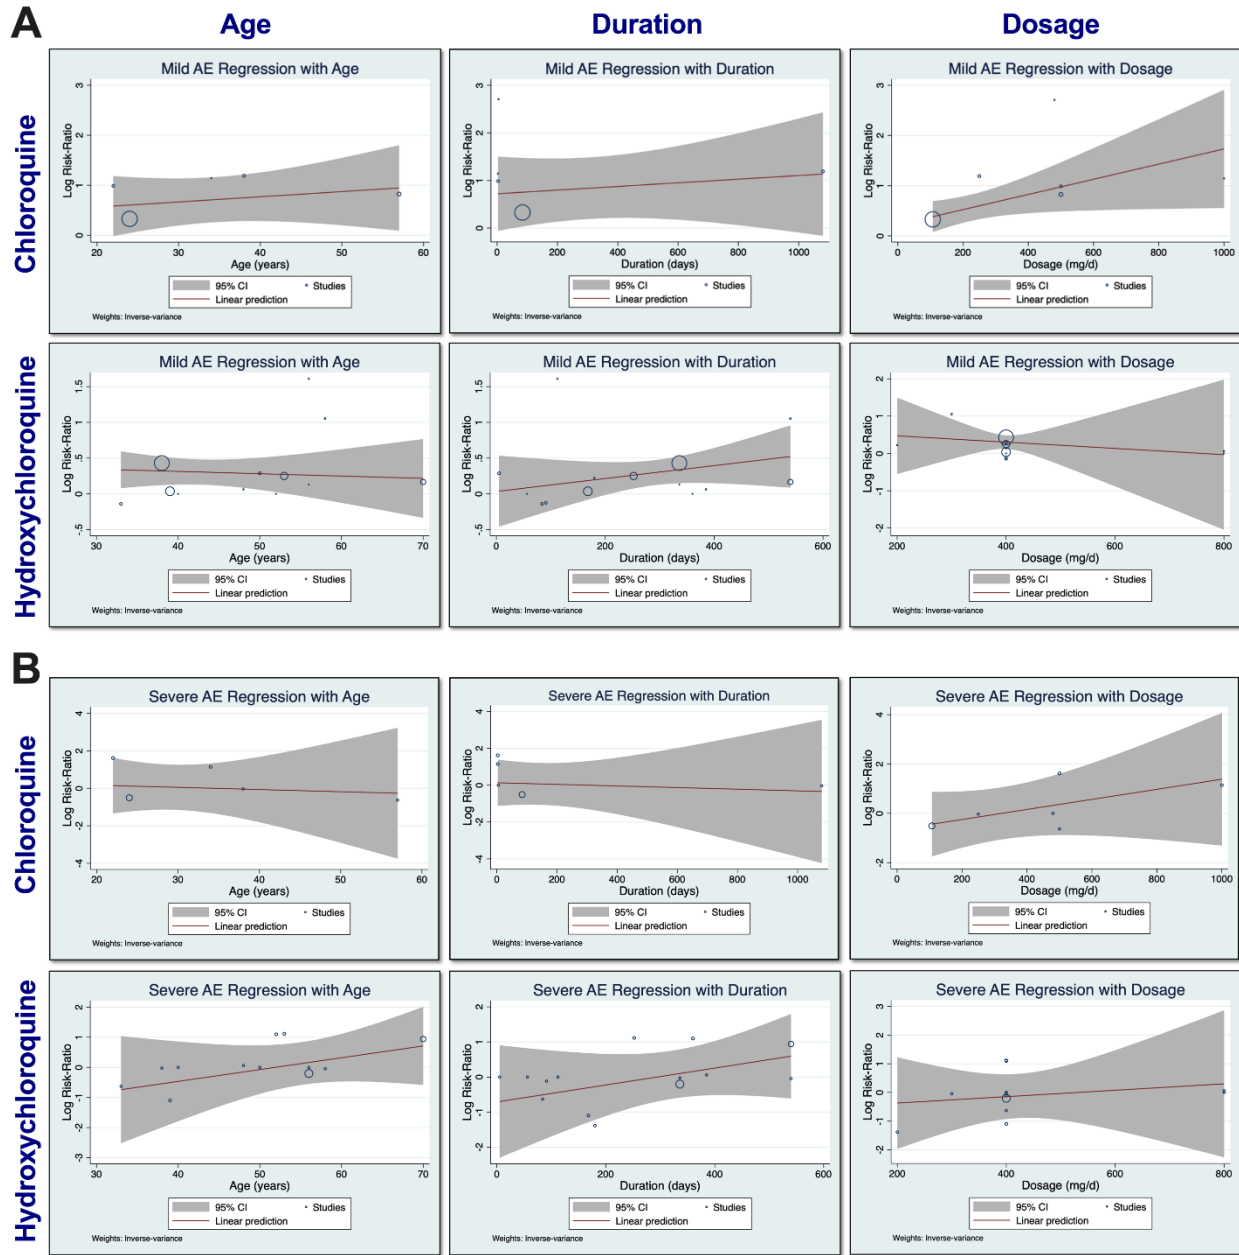

**Supplementary Figure 1.** A) Meta-regression analyses of mild and B) severe AEs with respect to age, duration, and dosage.

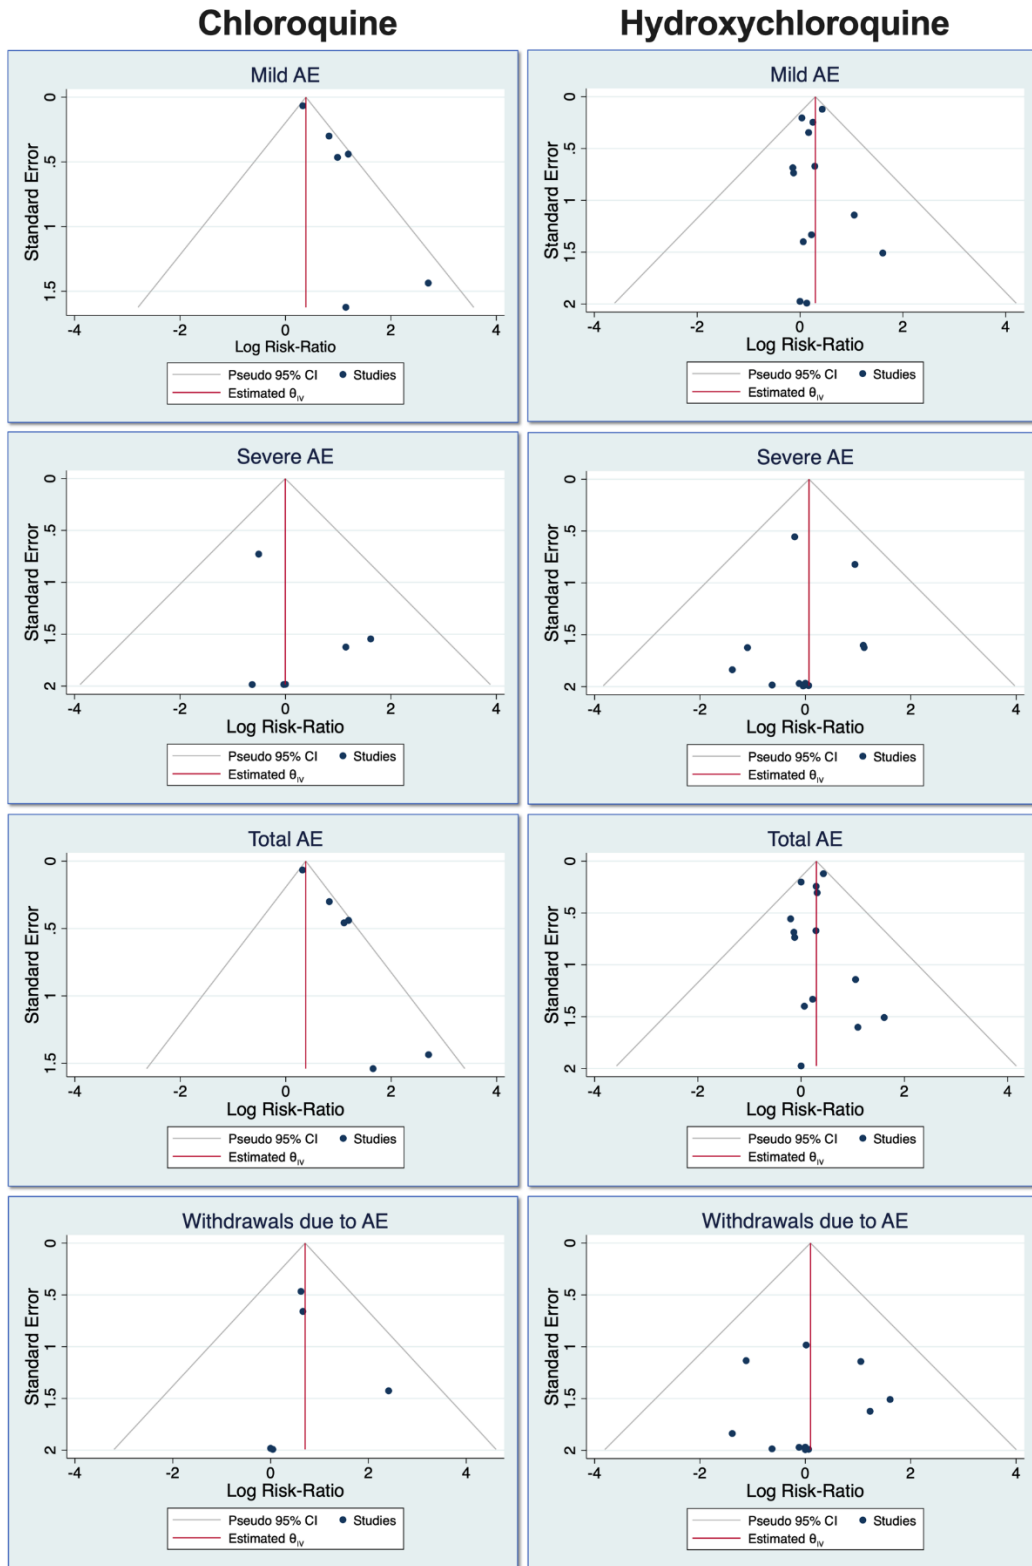

**Supplementary Figure 2.** Funnel plots showing publication bias for mild, severe, total AEs, and withdrawals due to AEs.

### Chloroquine

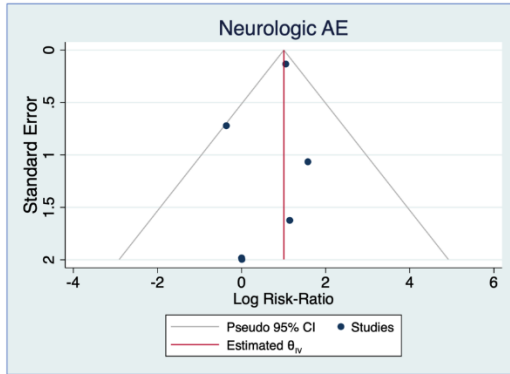

### Hydroxychloroquine

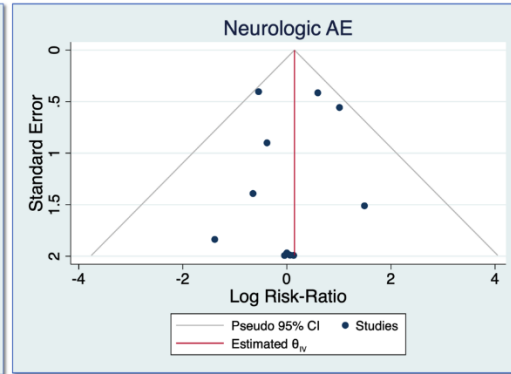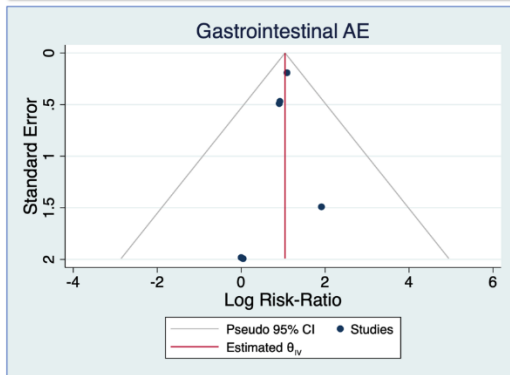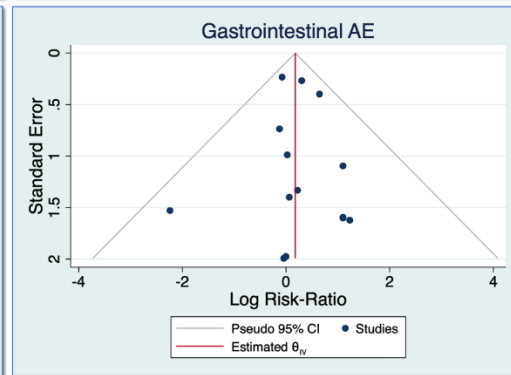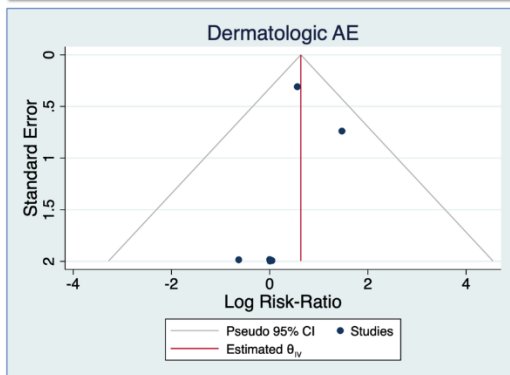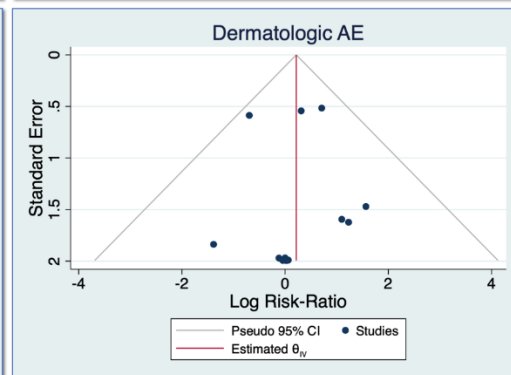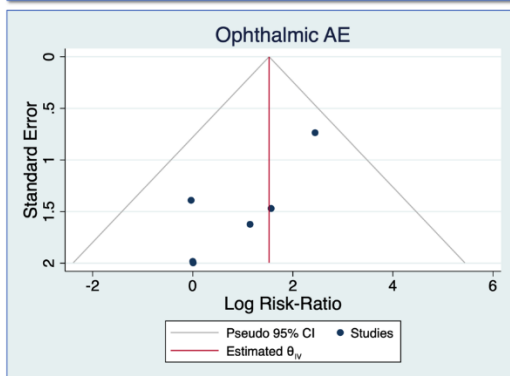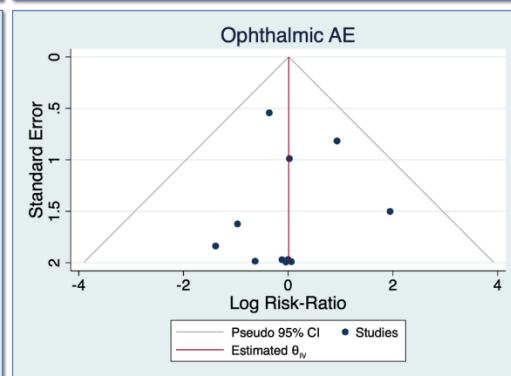

**Supplementary Figure 3.** Funnel plots showing publication bias for neurologic, gastrointestinal, dermatologic, and ophthalmic AEs.

## Chloroquine

## Hydroxychloroquine

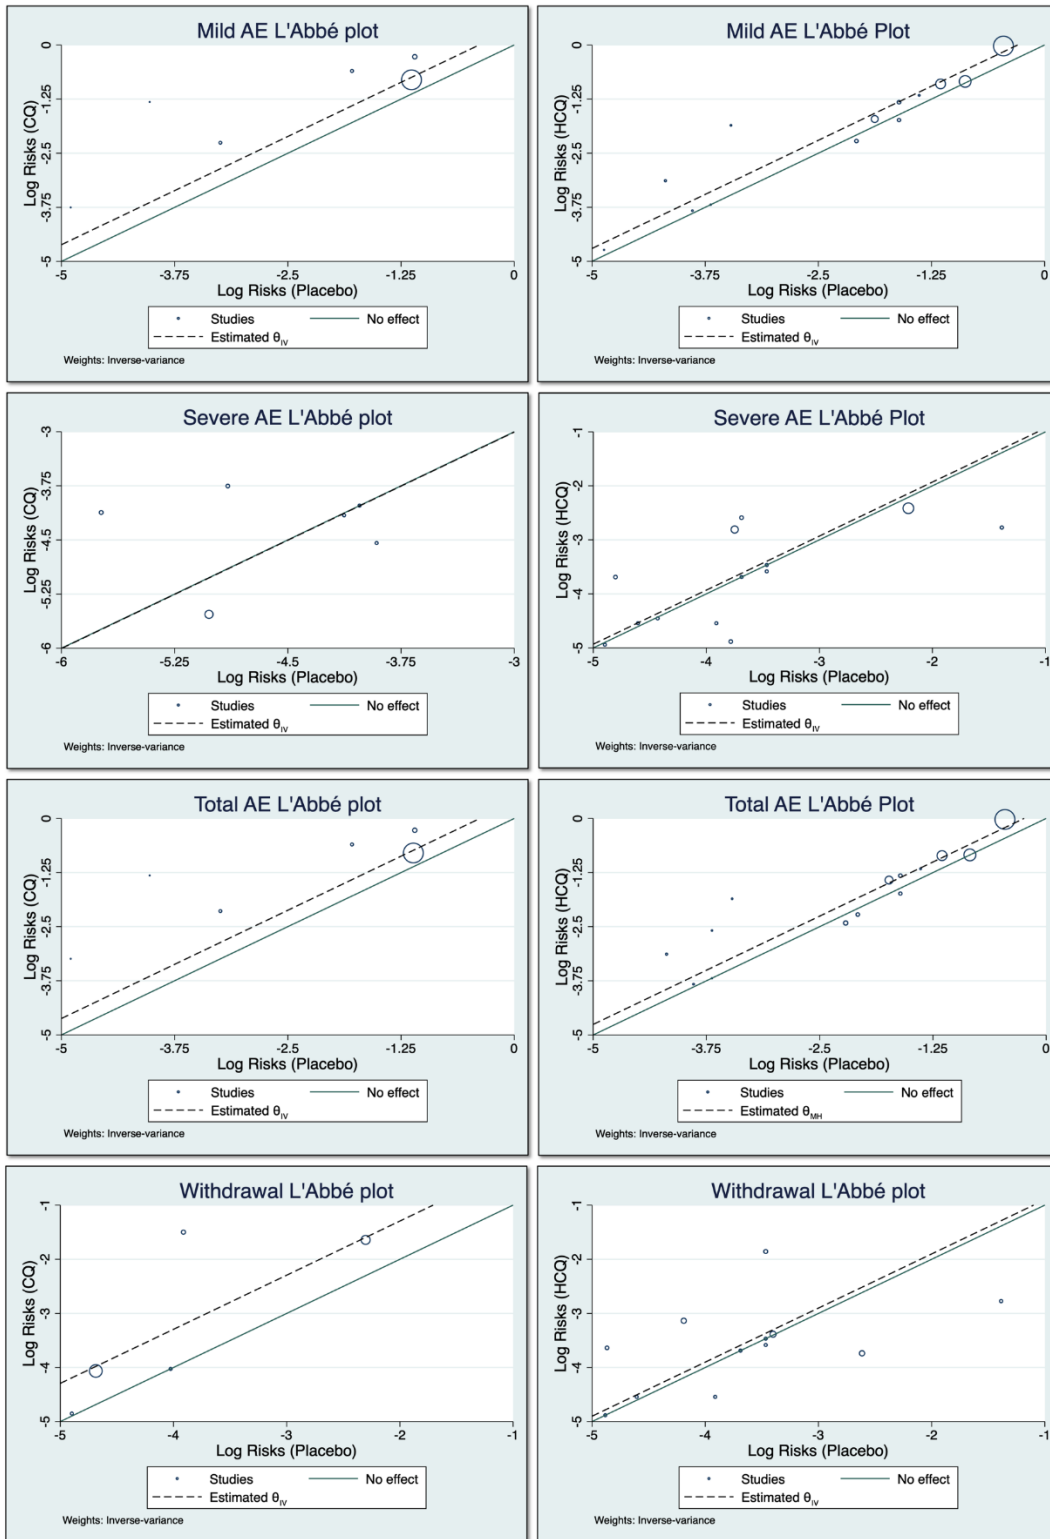

**Supplementary Figure 4.** L'Abbé Plots examining heterogeneity for mild AEs, severe AEs, total AEs, and withdrawals due to AEs.

## Chloroquine

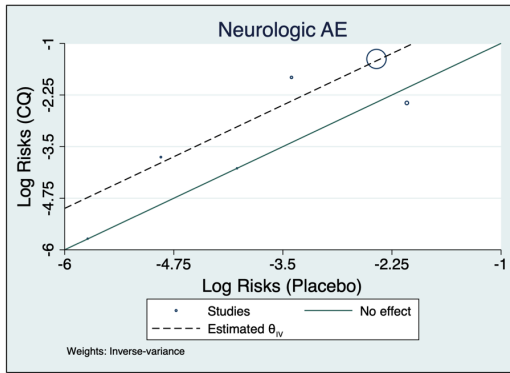

## Hydroxychloroquine

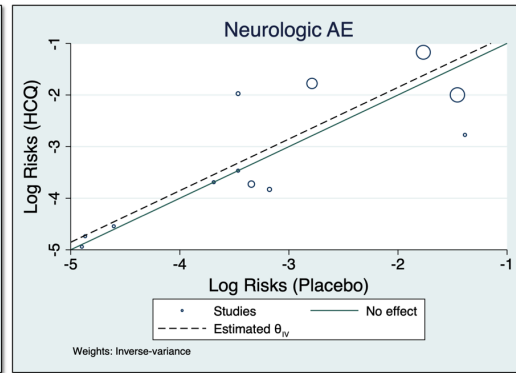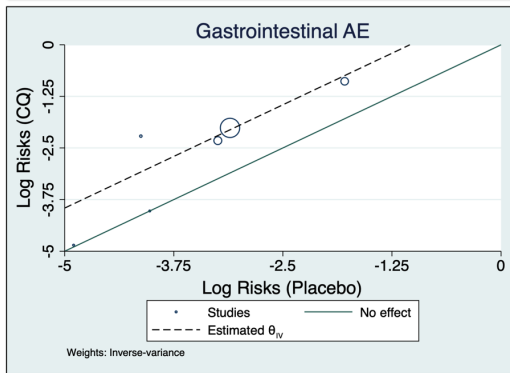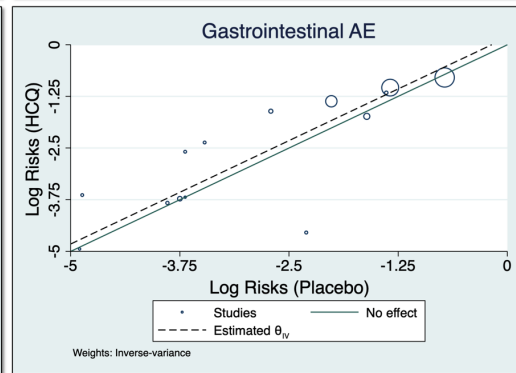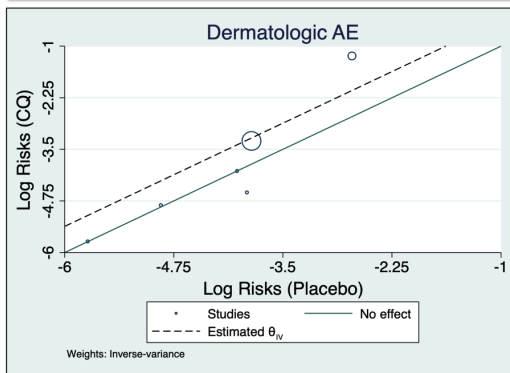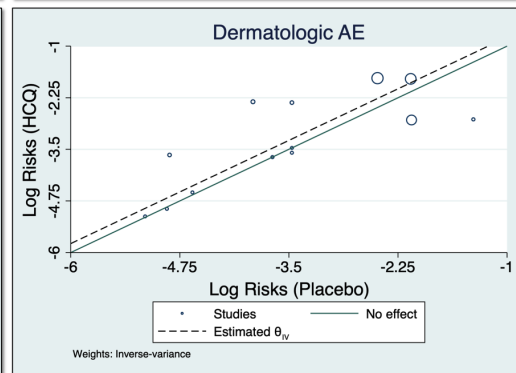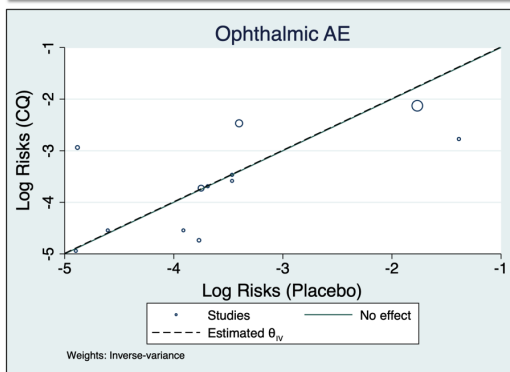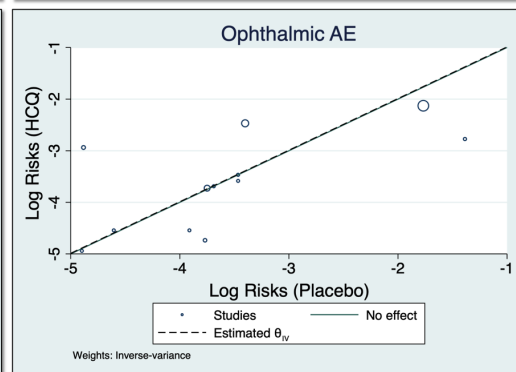

**Supplementary Figure 5.** L'Abbé Plots examining heterogeneity for neurologic, gastrointestinal, dermatologic, and ophthalmic AEs.

**Supplementary Table 1. Risk of Bias Assessment**

| <b>Chloroquine Studies</b>        |                                   |                               |                            |                              |                                              |                                      |                                |
|-----------------------------------|-----------------------------------|-------------------------------|----------------------------|------------------------------|----------------------------------------------|--------------------------------------|--------------------------------|
| <b>Study</b>                      | <b>Random Sequence Generation</b> | <b>Allocation Concealment</b> | <b>Selective Reporting</b> | <b>Other Sources of Bias</b> | <b>Blinding (Participants and Personnel)</b> | <b>Blinding (Outcome Assessment)</b> | <b>Incomplete Outcome Data</b> |
| *Arnaout et al. (2019)            | LR                                | UR                            | LR                         | LR                           | LR                                           | UR                                   | LR                             |
| *Terrabuio et al. (2018)          | LR                                | LR                            | LR                         | UR                           | LR                                           | LR                                   | LR                             |
| *Borges et al. (2013)             | UR                                | UR                            | LR                         | UR                           | LR                                           | UR                                   | LR                             |
| *Paton et al. (2011)              | LR                                | LR                            | LR                         | LR                           | LR                                           | LR                                   | LR                             |
| *Tricou et al. (2010)             | LR                                | LR                            | LR                         | LR                           | LR                                           | LR                                   | LR                             |
| *De Lamballerie et al. (2009)     | UR                                | UR                            | HR                         | UR                           | UR                                           | UR                                   | UR                             |
| <b>Hydroxychloroquine Studies</b> |                                   |                               |                            |                              |                                              |                                      |                                |
| <b>Study</b>                      | <b>Random Sequence Generation</b> | <b>Allocation Concealment</b> | <b>Selective Reporting</b> | <b>Other Sources of Bias</b> | <b>Blinding (Participants and Personnel)</b> | <b>Blinding (Outcome Assessment)</b> | <b>Incomplete Outcome Data</b> |
| *Chen et al. (2020)               | LR                                | LR                            | LR                         | LR                           | LR                                           | LR                                   | LR                             |
| *Boonpiyathad et al. (2017)       | LR                                | LR                            | LR                         | LR                           | HR                                           | UR                                   | LR                             |
| *Wasko et al. (2016)              | LR                                | LR                            | LR                         | LR                           | LR                                           | LR                                   | LR                             |
| *Gottenberg et al. (2014)         | LR                                | LR                            | LR                         | LR                           | LR                                           | LR                                   | LR                             |
| *Solomon et al. (2014)            | LR                                | LR                            | LR                         | LR                           | LR                                           | LR                                   | LR                             |
| *Rotaru et al. (2014)             | LR                                | LR                            | LR                         | LR                           | LR                                           | UR                                   | UR                             |
| *Paton et al. (2012)              | LR                                | LR                            | LR                         | LR                           | LR                                           | LR                                   | LR                             |
| *Fong et al. (2007)               | LR                                | LR                            | LR                         | LR                           | LR                                           | LR                                   | LR                             |
| *Gerstein et al. (2001)           | LR                                | LR                            | LR                         | LR                           | LR                                           | LR                                   | LR                             |
| *Van Gool et al. (2001)           | LR                                | LR                            | LR                         | LR                           | LR                                           | LR                                   | LR                             |
| *Sperber et al. (1995)            | LR                                | LR                            | LR                         | LR                           | LR                                           | LR                                   | LR                             |
| *The HERA Study Group (1995)      | LR                                | LR                            | LR                         | LR                           | LR                                           | LR                                   | LR                             |
| *Clark et al. (1993)              | LR                                | LR                            | LR                         | LR                           | LR                                           | LR                                   | LR                             |
| *Kruize et al. (1993)             | LR                                | LR                            | LR                         | LR                           | LR                                           | LR                                   | LR                             |

**Supplementary Table 1.** LR = low risk, UR = unclear risk, HR = high risk
